# Supplementary material for: An europium(iii) metal–organic framework as a multi-responsive luminescent sensor for highly sensitive and selective detection of 4-nitrophenol and I− and Fe3+ ions in water
Source: Royal Society of Chemistry journal article supplement (doi:10.1039/d1dt02312h), 2021-01-01
Supplement: d1dt02312h1.pdf [file d1dt02312h1.pdf]

## Supplementary information

**An europium(III) metal–organic framework as a multi-responsive luminescent sensor for highly sensitive and selective detection of 4-nitrophenol, I<sup>-</sup> and Fe<sup>3+</sup> in water**

Meng-Yao Zhang,<sup>a</sup> Feng-Ying Yi,<sup>a</sup> Lan-Jun Liu,<sup>a, b, \*</sup> Guo-Ping Yan,<sup>a</sup> Hui Liu,<sup>a</sup> Jun-Fang Guo<sup>a, \*</sup>

a. Hubei Key Laboratory of Plasma Chemistry and Advanced Materials, School of Materials Science and Engineering, Wuhan Institute of Technology, Wuhan 430205, China.

b. School of Civil Engineering and Architecture, Wuhan Institute of Technology, Wuhan 430205, China.

\* Corresponding author: Lan-Jun Liu; Jun-Fang Guo

E-mail: wltjliu@sina.com; junfangguo@aliyun.com

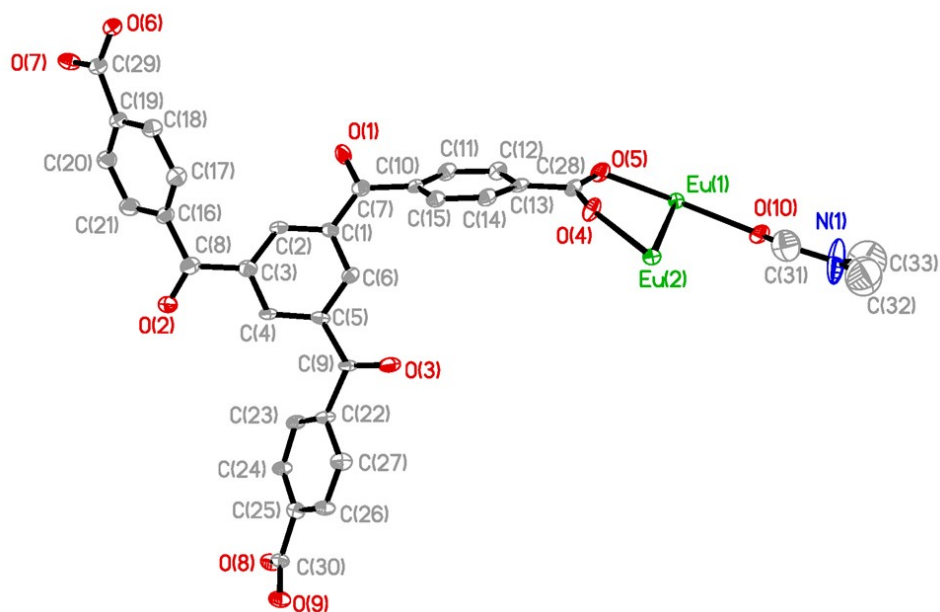

**Fig. S1.** ORTEP structure of compound **1** with hydrogen atoms omitted for clarity.

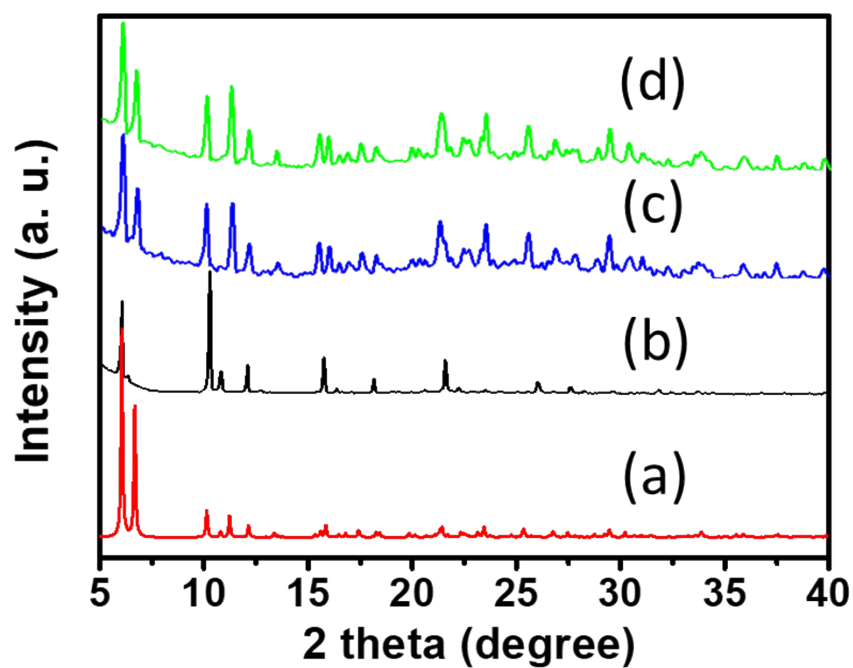

**Fig. S2** Powder XRD patterns of **1** (a) simulated, (b) as-synthesized, (c) recycled from 4-NP, (d) recycled from I<sup>-</sup>.

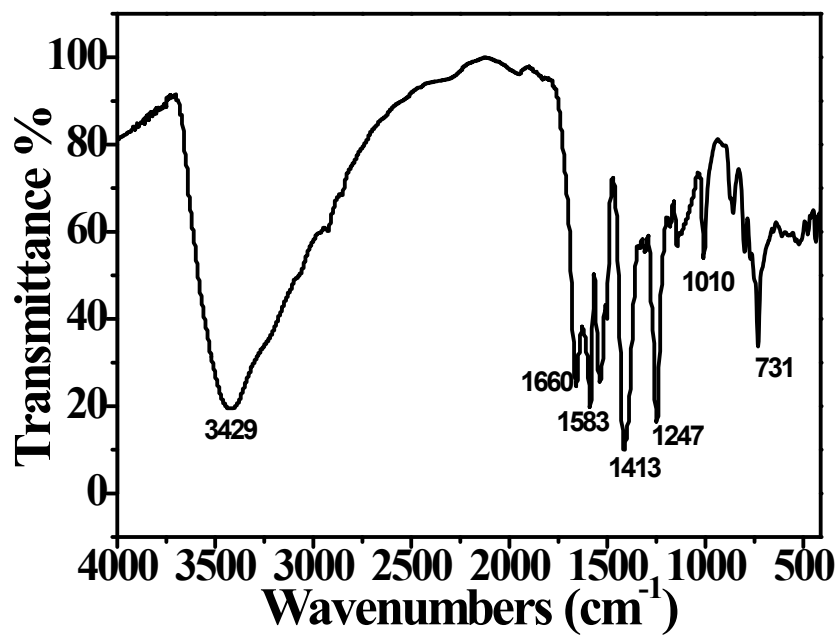

Fig. S3 IR spectrum of compound 1.

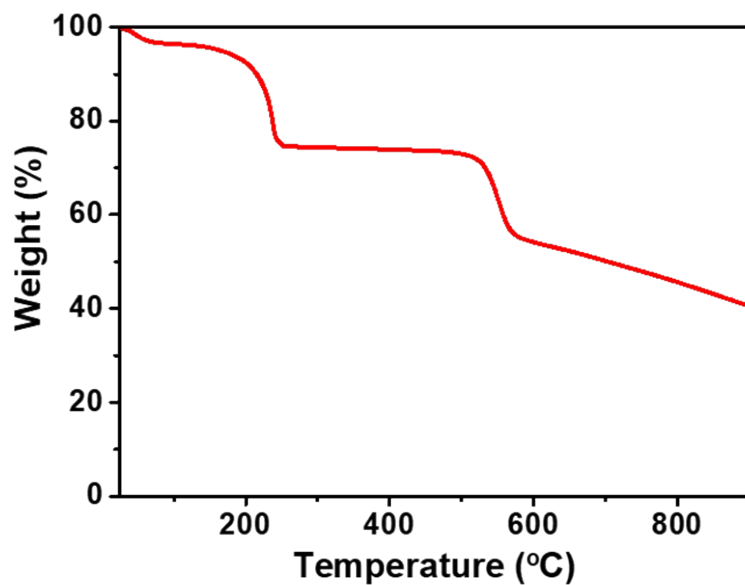

Fig. S4 The TGA curve of compound 1 under N<sub>2</sub> atmosphere at the heating rate of 5 °C·min<sup>-1</sup>.

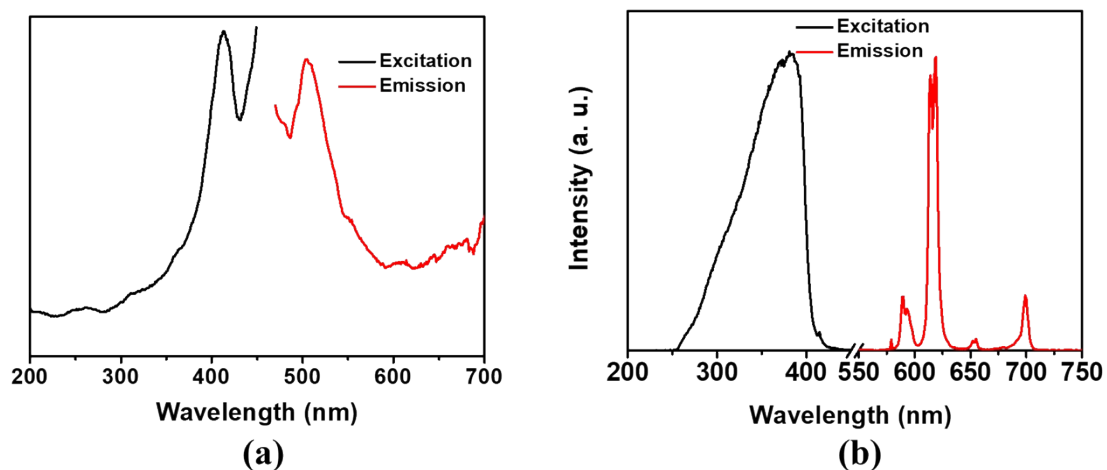

**Fig. S5** Excitation and emission spectra of (a) free ligand H<sub>3</sub>BCB and (b) compound 1.

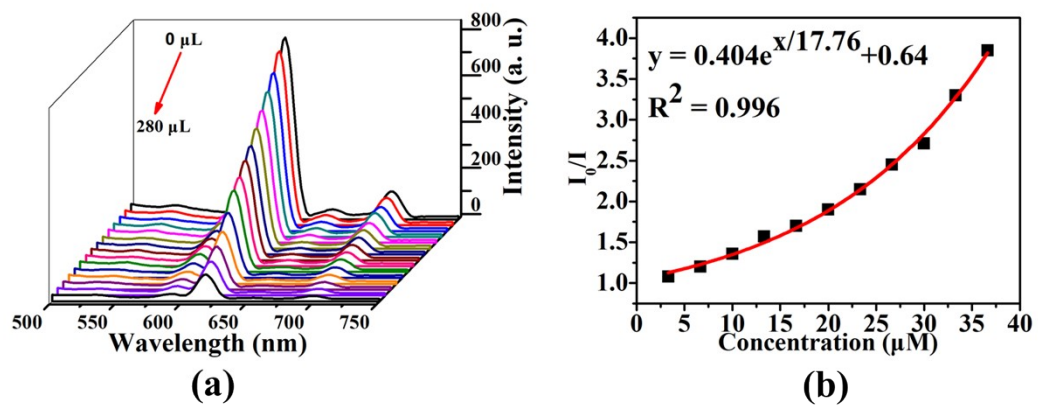

**Fig. S6** (a) Photoluminescence spectra of 1 upon progressive addition of 4-NP aqueous solution (0.33 mM, 20  $\mu$ L each time); (b) Stern-Volmer plot of  $I_0/I$  versus 4-NP concentration in water.

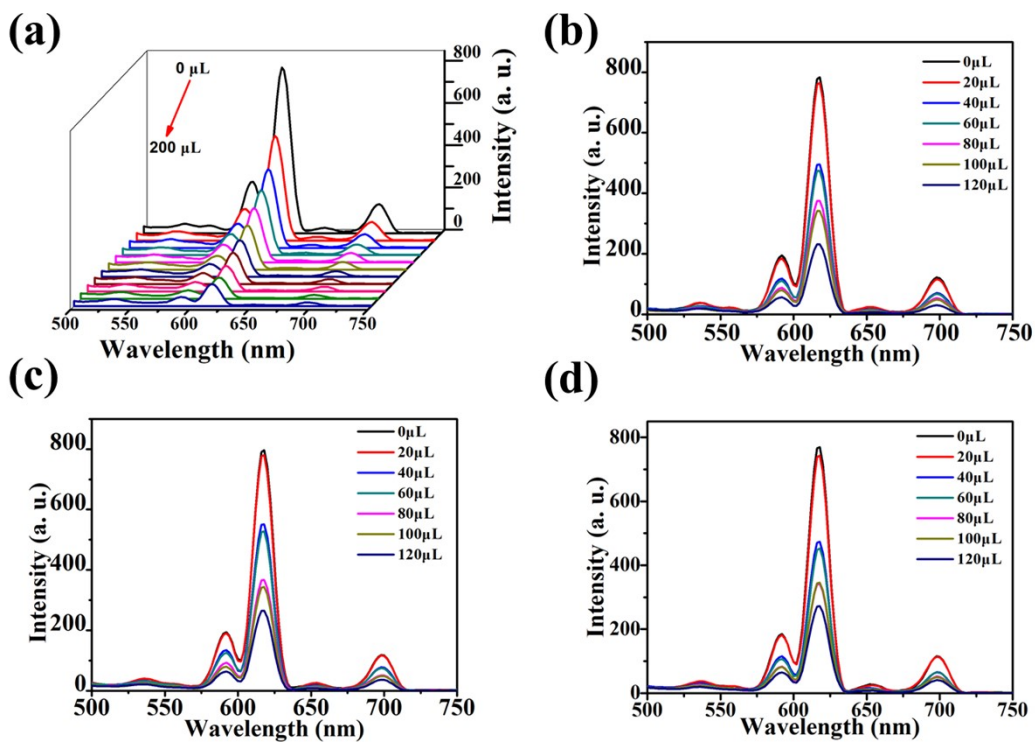

**Fig. S7** Photoluminescence spectra of compound **1** upon progressive addition of the 4-NP aqueous solution (1.25 mM, 20  $\mu\text{L}$  addition each time) (a); Tracked emission spectra of compound **1** upon the addition of 4-NP in the presence and absence of toluene (b); m-NT (c); 2,4-DNT(d).

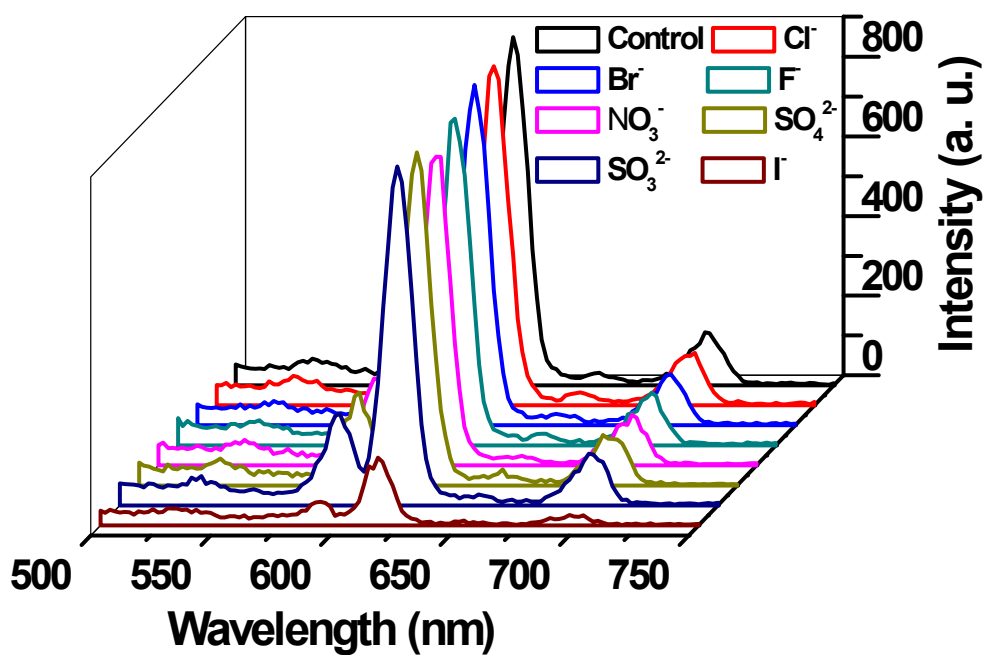

**Fig. S8** Emission spectra ( $\lambda_{\text{ex}} = 230 \text{ nm}$ ) of **1** dispersed in water after the addition of different anion aqueous solutions (0.10 M, 20  $\mu\text{L}$ ).

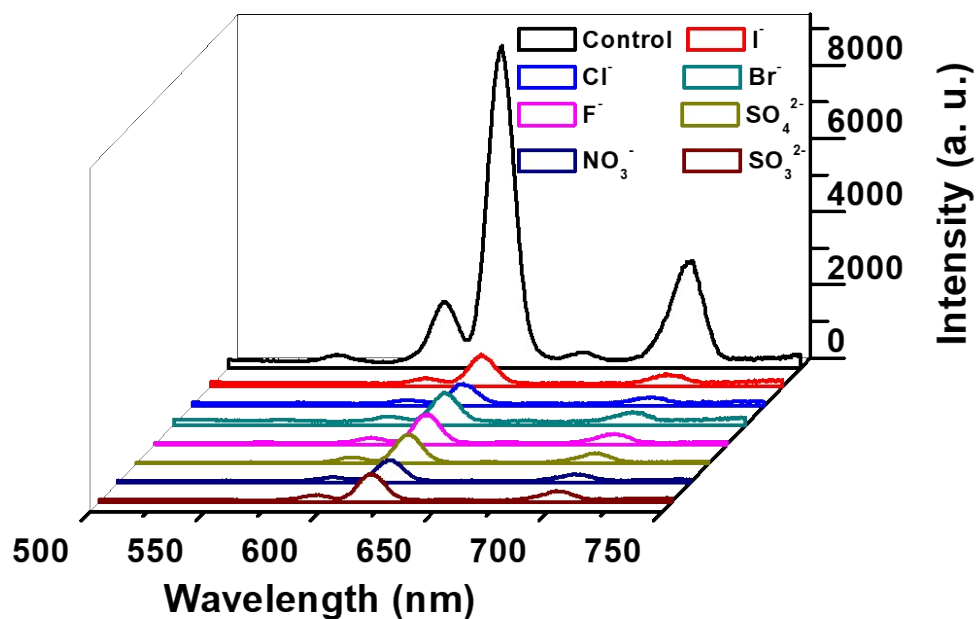

**Fig. S9** Luminescence intensity of **1** in water in the presence of  $I^-$  and other different anions excited at 230 nm.

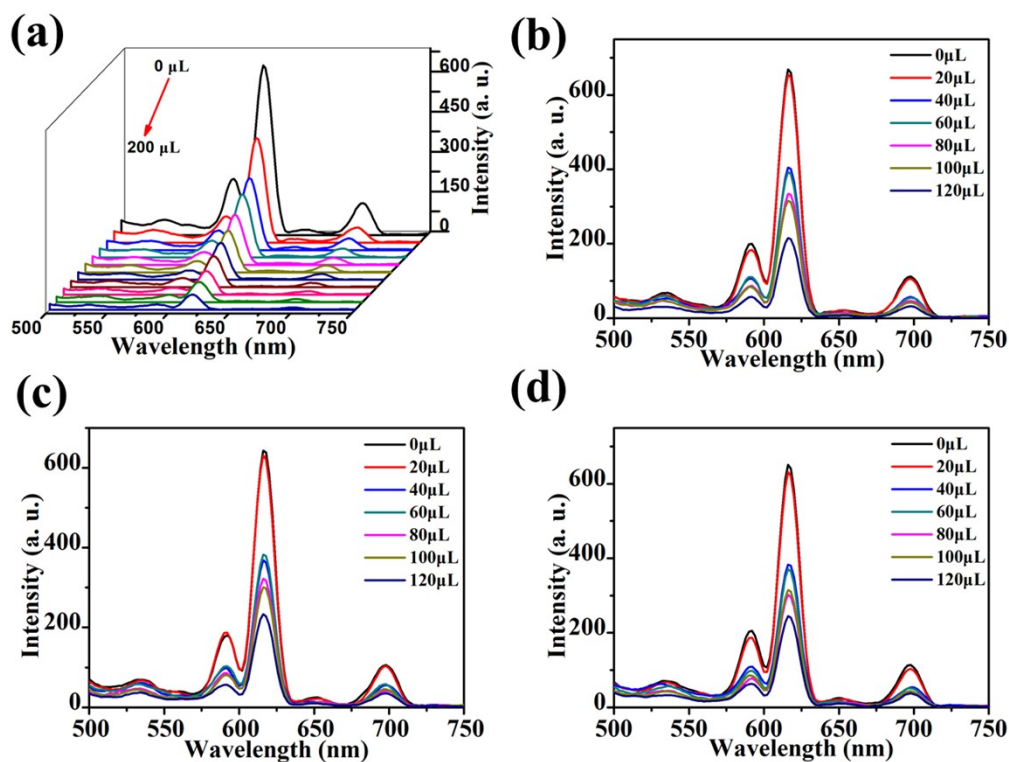

**Fig. S10** Photoluminescence spectra of compound **1** upon progressive addition of the  $Fe^{3+}$  ion aqueous solution (5 mM, 20  $\mu$ L addition each time) (a); Tracked emission spectra of compound **1** upon the addition of  $Fe^{3+}$  in the presence and absence of  $Na^+$  (b);  $Ca^{2+}$  (c);  $Ni^{2+}$  (d).

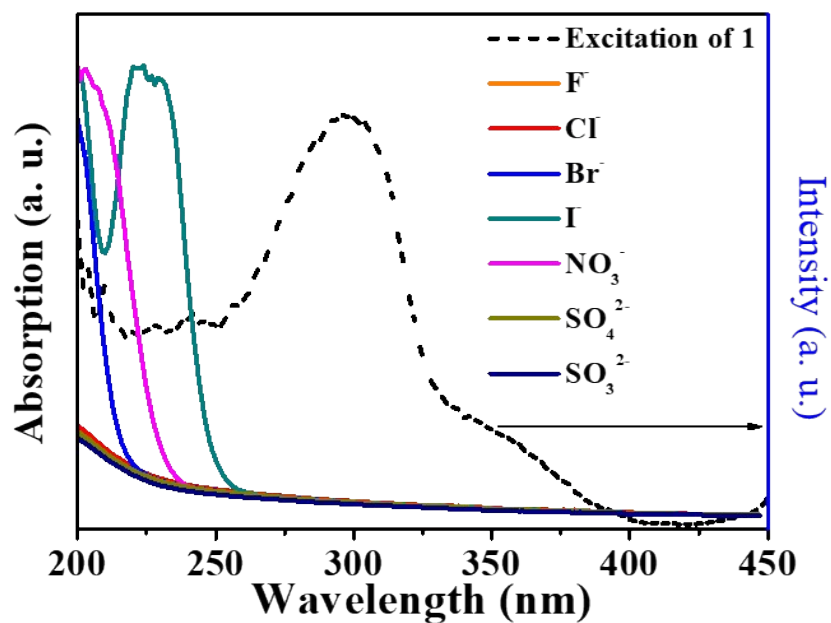

Fig. S11 The excitation spectra of the suspension of **1** and the absorption spectra of anions in water.

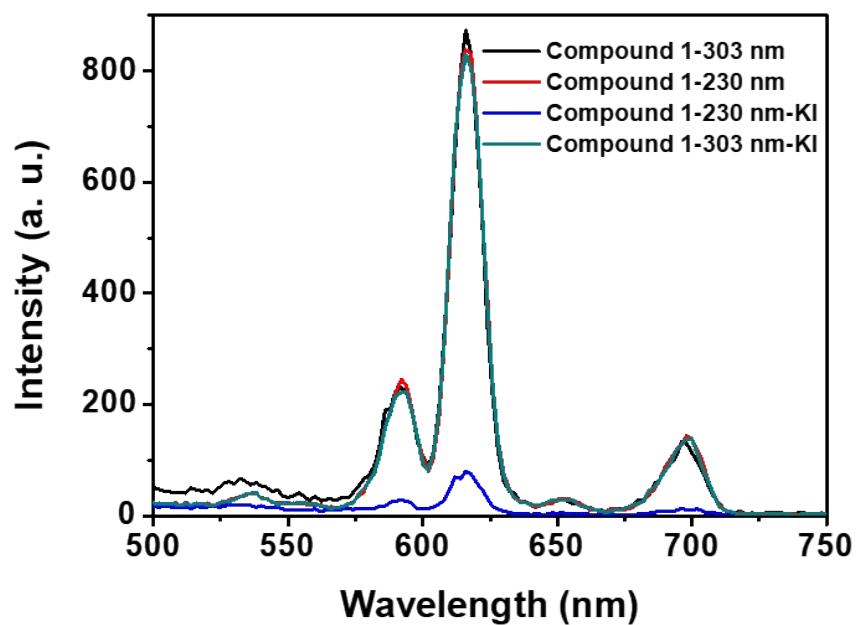

Fig. S12 Photoluminescence spectra of compound **1** in the presence or absence of  $\text{I}^-$  (Conc. = 1 mM) in water excited upon 230 or 303 nm.

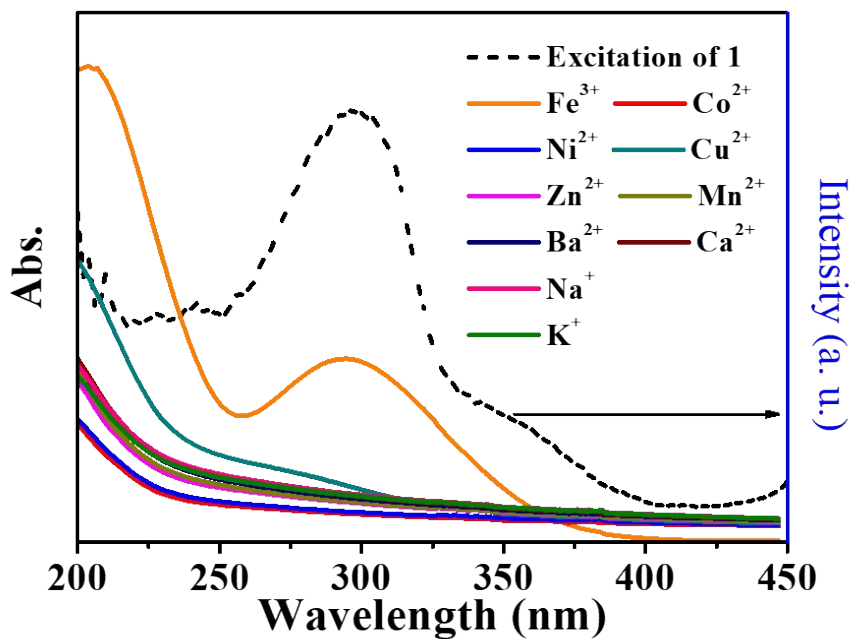

**Fig. S13** The excitation spectra of the suspension of **1** and the absorption spectra of metal ions in water.

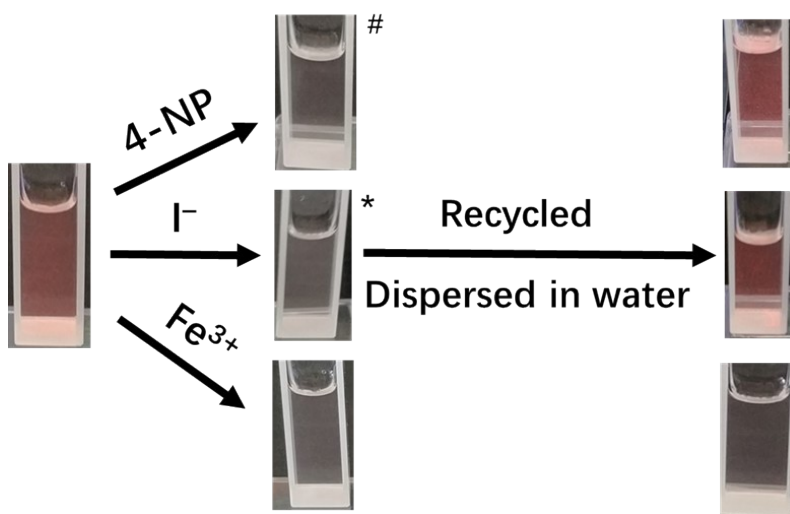

**Fig. S14** The visual color change of aqueous suspension of **1** before and after adding 4-NP,  $I^-$  and  $Fe^{3+}$  and the recyclable samples dispersed in water under UV light ( $\lambda_{ex} = 365$  nm; #:  $\lambda_{ex} = 303$  nm; \*:  $\lambda_{ex} = 230$  nm).



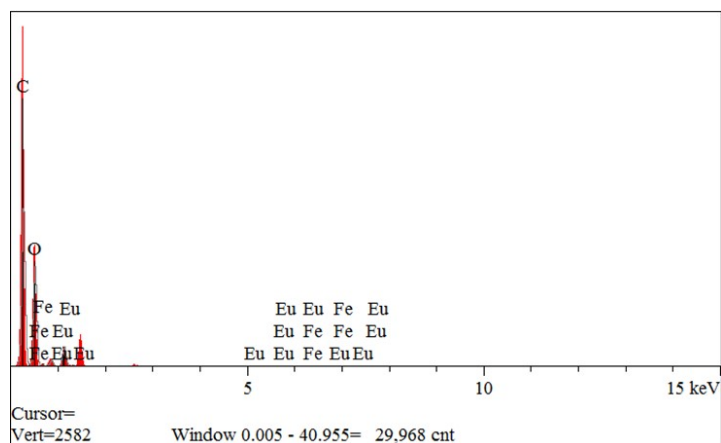

**Fig. S15** Energy-dispersive X-ray spectroscopy (EDS) spectrum of **1** after treatment with the  $\text{Fe}^{3+}$  aqueous solution.

**Table S1.** Comparison of the 4-NP Detection Efficiency of **1** with Other Sensors

|    | 4-NP sensors                                                                                                            | Ksv ( $\text{M}^{-1}$ ) | Detection Limit              | Refs.     |
|----|-------------------------------------------------------------------------------------------------------------------------|-------------------------|------------------------------|-----------|
| 1  | $[\text{Zn}_2(\text{TCPE})(\text{tta})_2] \cdot 2\text{DMF} \cdot 4\text{H}_2\text{O} \cdot 2\text{Me}_2\text{NH}_2$    | $0.16 \times 10^4$      | 94.59 ppb                    | 1         |
| 2  | $[\text{Zn}(\text{L}^4)(\text{H}_2\text{O})] \cdot \text{H}_2\text{O}$                                                  | $1.25 \times 10^4$      | 0.52 ppm                     | 2         |
| 3  | $[\text{Zn}_2(1,4\text{-bdc})(1,4\text{-Hbdc})_2(\text{NI-bpy-34})_2]$                                                  | 1000                    | $13.25 \times 10^{-6}$ mol/L | 3         |
| 4  | $\{[\text{Eu}(\text{L})(\text{HCOO})] \cdot \text{H}_2\text{O}\}_n$                                                     | 13784                   | $3 \times 10^{-9}$ mol/L     | 4         |
| 5  | $[\text{Eu}(\text{L})(\text{H}_2\text{O})] \cdot 1.5\text{H}_2\text{O}$                                                 | 75130                   | $9.2 \times 10^{-7}$ mol/L   | 5         |
| 6  | $[\text{In}_3\text{O}(\text{ADBA})_3(\text{H}_2\text{O})_3](\text{NO}_3) \cdot (\text{H}_2\text{O})_6$                  | $5.1 \times 10^4$       | Not given                    | 6         |
| 7  | $\{[\text{Tb}(\text{TATAB})(\text{H}_2\text{O})_2] \cdot \text{NMP} \cdot \text{H}_2\text{O}\}_n$                       | $3.7 \times 10^5$       | 140 ppm                      | 7         |
| 8  | $[\text{Tb}(\text{TAIP})(\text{DMF})_2]$                                                                                | $3.35 \times 10^4$      | $6 \times 10^{-7}$ mol/L     | 8         |
| 9  | $[\text{Gd}_6(\text{L})_3(\text{HL})_2(\text{H}_2\text{O})_{10}]_{18} \cdot \text{H}_2\text{O} \cdot x(\text{solvent})$ | $8.4 \times 10^3$       | 1.7ppm                       | 9         |
| 10 | $[\text{Pb}(\text{BPDP})]$                                                                                              | $6.45 \times 10^4$      | $6 \times 10^{-4}$ mol/L     | 10        |
| 11 | $[\text{Pb}_3(\text{BPDP})_{1.5}(\text{OOCCH}_2\text{COOH})_3]$                                                         | $4.2 \times 10^4$       | $7 \times 10^{-4}$ mol/L     | 10        |
| 12 | $[\text{Zn}(\text{L})(\text{H}_2\text{O})] \cdot \text{H}_2\text{O}$                                                    | $1.25 \times 10^4$      | $3.74 \times 10^{-6}$ mol/L  | 2         |
| 13 | <b>1</b>                                                                                                                | $4.7 \times 10^4$       | $4.15 \times 10^{-7}$ mol/L  | This work |

1. X. D. Zhang, G. J. Ren, M. L. Li, W. T. Yang, and Q. H. Pan, *Cryst. Growth Des.*, 2019, 19,6308-6314.
2. X. Y. Guo, F. Zhao, J. J. Liu, Z. L. Liu, and Y. Q. Wang, *J. Mater. Chem. A*, 2017,5, 20035-20043.
3. M. J. Tsai, C. Y. Li and J. Y. Wu, *CrystEngComm*, 2018, 20, 6762-6774.
4. Y. Liu, J. Ma, C. Xu, Y. Yang, M. Xia, H. Jiang and W. Liu, *Dalton Trans.*, 2018, 47, 13543-13549.
5. Y. Tao, P. Zhang, J. Liu, X. Chen, X. Guo, H. Jin, J. Chai, L. Wang and Y. Fan, *New J. Chem.*, 2018, 42, 19485-19493.
6. X. Liu, B. Liu, G. Li and Y. Liu, *J. Mater. Chem. A.*, 2018, 6, 17177-17185.
7. G. X. Wen, M. L. Han, X. Q. Wu, Y. P. Wu, W. W. Dong, J. Zhao, D. S. Li and L. F. Ma, *Dalton Trans.*, 2016, 45, 15492-15499.
8. D. Wang, L. Sun, C. Hao, Y. Yan and Z. Liang, *RSC Adv.*, 2016, 6, 57828-57834.
9. Q. H. Tan, Y. Q. Wang, X. Y. Guo, H. T. Liu and Z. L. Liu, *RSC Adv.*, 2016, 6, 61725-61731.
10. B. Xing, H. Y. Li, Y. Y. Zhu, Z. Zhao, Z. G. Sun, D. Yang and J. Li, *RSC Adv.*, 2016, 6, 110255- 110265.

Table S2. Comparison of the I<sup>-</sup> Detection Efficiency of **1** with Other Sensors

|    | I <sup>-</sup> sensors                                                     | Ksv (M <sup>-1</sup> )      | LOD(μM) | Refs.     |
|----|----------------------------------------------------------------------------|-----------------------------|---------|-----------|
| 1  | IPF                                                                        | 4310                        | 0.80    | 1         |
| 2  | Cz-TPM                                                                     | 2372                        | 7.9     | 2         |
| 3  | benzimidazole-based tripodalreceptor                                       | $(1.5 \pm 0.2) \times 10^3$ | 7.45    | 3         |
| 4  | imidazolium-based cyclophane                                               | Not given                   | 10      | 4         |
| 5  | quinoxaline-based azine derivatives                                        | Not given                   | 4.77    | 5         |
| 6  | D–A type Zn(II) complexes                                                  | Not given                   | 0.58    | 6         |
| 7  | NC-PNPs-Hg(II)nanocomplex                                                  | Not given                   | 0.9     | 7         |
| 8  | Cu(I)-MOF                                                                  | Not given                   |         | 8         |
| 9  | Tb/Zn Hetero-MOF                                                           | $1.8 \times 10^5$           | 0.01    | 9         |
| 10 | Cd-MOF                                                                     | $1.8 \times 10^4$           | 0.63    | 10        |
| 11 | [Tb(cpia)(H <sub>2</sub> O) <sub>2</sub> ] <sub>n</sub> ·nH <sub>2</sub> O | $1.23 \times 10^4$          | 2.29    | 11        |
| 12 | <b>1</b>                                                                   | $1.57 \times 10^4$          | 1.57    | This work |

- Z. Chen, R. Sun, S. Feng, D. Wang and H. Liu, ACS Appl. Mater. Interfaces, 2020, 12, 11104–11114.
- Q. Q. Dang, H. J Wan, and X. M. Zhang, ACS Appl. Mater. Interfaces, 2017, 9, 21438–21446.
- D. Y. Lee, S. Narinder, J. K. Min and O. J. Doo, Org. Lett., 2011, 13, 3024–3027.
- V. Suresh, N. Ahmed, I. S. Youn and K. S. Kim, Chem-Asian J., 2012, 7, 658–663.
- B. Gopal and S. Velmathi, Sens. Actuators B, 2018, 256, 126–134.
- H. Su, L. Hao, W. Hussain, Z. Li and H. Li, CrystEngComm, 2020, 22, 2103–2109.
- Y. Fan, L. Han, S. Liu, Y. Zhang, H. Luo and N. Li, J. Mater. Chem. C, DOI: 10.1039/d0tc01983f.
- Y. Q. Chen, G. R. Li, Z. Chang, Y. K. Qu, Y. H. Zhang and X. H. Bu, Chem. Sci., 2013, 4, 3678–3682.
- P. F. Shi, H. C. Hu, Z. Y. Zhang, G. Xiong and B. Zhao, Chem. Commun., 2015, 51, 3985–3988.
- D. K. Singha, P. Majee, S. K. Mondal and P. Mahata, J. Photochem. Photobiol. A: Chem., 2018, 356, 389–396.
- L. J. Liu, M. Y. Zhang, Q. Z. Guo, Z. H. Zhang, and J. F. Guo, Dalton Trans., 2021, 50, 1697–1702.

Table S3. Comparison of the Fe<sup>3+</sup> Detection Efficiency of **1** with Other Sensors

|    | Fe <sup>3+</sup> sensors                                                                                    |                  | K <sub>sv</sub> (M <sup>-1</sup> ) | Detection Limit              | Refs.     |
|----|-------------------------------------------------------------------------------------------------------------|------------------|------------------------------------|------------------------------|-----------|
| 1  | Bio-MOF-1@RhB                                                                                               | Fe <sup>3+</sup> | Not given                          | 1.1 ppm                      | 1         |
| 2  | UiO-66@N                                                                                                    | Fe <sup>3+</sup> | Not given                          | 0.69 ppm                     | 2         |
| 3  | {[Cd <sub>2</sub> (L) <sub>2</sub> (bpe) <sub>2</sub> ]·3DMF·2.5H <sub>2</sub> O}                           | Fe <sup>3+</sup> | 1.74×10 <sup>4</sup>               | 6.1×10 <sup>-7</sup> mol/L   | 3         |
| 4  | {[Cd(L)(bipb)]·2DMF} <sub>n</sub>                                                                           | Fe <sup>3+</sup> | 3.39×10 <sup>4</sup>               | 1.24×10 <sup>-6</sup> mol/L  | 3         |
| 5  | {[Eu(L)(HCOO)]·H <sub>2</sub> O} <sub>n</sub>                                                               | Fe <sup>3+</sup> | 7461                               | 1×10 <sup>-9</sup> mol/L     | 4         |
| 6  | {[Zn(nBuOip)(bpp)]·2H <sub>2</sub> O} <sub>n</sub>                                                          | Fe <sup>3+</sup> | 1474                               | 5.442×10 <sup>-5</sup> mol/L | 5         |
| 7  | [Tb <sub>4</sub> L <sub>4</sub> (NO <sub>3</sub> ) <sub>2</sub> (Piv) <sub>2</sub> ]·2CH <sub>3</sub> OH    | Fe <sup>3+</sup> | 1.86×10 <sup>4</sup>               | 1×10 <sup>-5</sup> mol/L     | 6         |
| 8  | [Eu(IMS1) <sub>2</sub> Cl·4H <sub>2</sub> O                                                                 | Fe <sup>3+</sup> | 5873.4                             | 2.3×10 <sup>-5</sup> mol/L   | 7         |
| 9  | {[Zn(L) <sub>0.5</sub> (btdpe)]·H <sub>2</sub> O} <sub>n</sub>                                              | Fe <sup>3+</sup> | 5.1×10 <sup>4</sup>                | 5.9×10 <sup>-7</sup> mol/L   | 8         |
| 10 | {Zn <sub>2</sub> (NO <sub>3</sub> ) <sub>2</sub> (4,4'-bpy) <sub>2</sub> (TBA)}                             | Fe <sup>3+</sup> | 7×10 <sup>4</sup>                  | 7.18×10 <sup>-6</sup> mol/L  | 9         |
| 11 | TMU-16                                                                                                      | Fe <sup>3+</sup> | 2.8×10 <sup>4</sup>                | 2×10 <sup>-7</sup> mol/L     | 10        |
| 12 | [Zn <sub>2</sub> (L) <sub>2</sub> (TPA)]·2H <sub>2</sub> O                                                  | Fe <sup>3+</sup> | 6.4×10 <sup>3</sup>                | 3.84×10 <sup>-6</sup> mol/L  | 11        |
| 13 | NKU-115                                                                                                     | Fe <sup>3+</sup> | 3.092×10 <sup>3</sup>              | 1.61×10 <sup>-6</sup> mol/L  | 12        |
| 14 | [Zn <sub>3</sub> (L) <sub>2</sub> (bipy) <sub>2</sub> (μ <sub>3</sub> -OH) <sub>2</sub> ]·3H <sub>2</sub> O | Fe <sup>3+</sup> | 2.3×10 <sup>4</sup>                | Not given                    | 13        |
| 15 | <b>1</b>                                                                                                    | Fe <sup>3+</sup> | 2.35×10 <sup>4</sup>               | 1.78×10 <sup>-6</sup> mol/L  | This work |

1. S. Let, P. Samanta, S. Dutta and S. K. Ghosh, *Inorg. Chim. Acta*, 2020, 500, 119205.
2. S. Fajal, P. Samanta, S. Dutta and S. K. Ghosh, *Inorg. Chim. Acta*, 2020, 502, 119359.
3. Z. Chen, X. Mi, J. Lu, S. Wang, Y. Li, J. Dou and D. Li, *Dalton Trans.*, 2018, 47, 6240-6249.
4. Y. Liu, J. Ma, C. Xu, Y. Yang, M. Xia, H. Jiang and W. Liu, *Dalton Trans.*, 2018, 47, 13543-13549.
5. R. R. Zhu, T. Wang, D. W. Wang, T. Yan, Q. Wang, H. X. Li, Z. Xue, J. Zhou, L. Du and Q. H. Zhao, *New J. Chem.*, 2019, 43, 1494-1504.

6. Y. Qin, Y. Ge, S. Zhang, H. Sun, Y. Jing, Y. Li and W. Liu, *RSC Adv.*, 2018, 8, 12641-12652.
7. Y. Q. Huang, H. Y. Chen, Y. Wang, Y. H. Ren, Z. G. Li, L. C. Li and Y. Wang, *RSC Adv.*, 2018, 8, 21444-21450.
8. C. Xu, C. Bi, Z. Zhu, R. Luo, X. Zhang, D. Zhang, C. Fan, L. Cui and Y. Fan, *CrystEngComm*, 2019, 21, 2333-2344.
9. X. Zhang, X. Zhuang, N. Zhang, C. Ge, X. Luo, J. Li, J. Wu, Q. Yang and R. Liu, *CrystEngComm*, 2019, 21, 1948-1955.
10. Y. D. Farahani, V. Safarifard, *J. Solid State Chem.*, 2019, 275, 131-140.
11. X.Y. Guo, Z. P. Dong, F. Zhao, Z.L. Liu, Y.Q. Wang, *New J. Chem.*, 2019, 43, 2353-2361.
12. W. H. Wang, Q. Gao, X. Y. Li, J. H. Wang, C. P. Wang, Y. H. Zhang, X. H. Bu, *Chin. Chem. Lett.*, 2019, 30, 75-78.
13. J. L. Dua, X.Y. Zhang, C.P. Li, J.P. Gao, J.X. Hou, X. Jing, Y.J. Mu, L.J. Li, *Sens. Actuators B.*, 2018, 257, 207-213.
